# Supplementary material
Source: HighWire-hosted journal article supplement (https://care.diabetesjournals.org/content/suppl/2006/03/01/29.3.643)

**Online Appendix: Patterns of Metabolic Progression to Type 1 Diabetes in the Diabetes Prevention Trial–Type 1**

Table 1. Comparisons of Glucose (mg/dl) and C-Peptide (ng/ml) Values (Mean ± SD) between Parenteral and Oral Trial Participants at the Visit 30 Months Before Diagnosis

|                                                                  | Parenteral<br>(n=22) | Oral<br>(n=32) | P-Value* |
|------------------------------------------------------------------|----------------------|----------------|----------|
| Fasting Glucose                                                  | 89 ± 11              | 88 ± 7         | 0.94     |
| 2-Hr Glucose                                                     | 132 ± 37             | 118 ± 27       | 0.11     |
| AUC Glucose                                                      | 18726 ± 2318         | 16572 ± 2009   | < 0.01   |
| Fasting C-Peptide                                                | 0.95 ± 0.72          | 1.16 ± 0.82    | 0.33     |
| Peak C-Peptide                                                   | 4.41 ± 1.59          | 5.46 ± 2.50    | 0.07     |
| AUC C-Peptide                                                    | 399 ± 175            | 493 ± 220      | 0.10     |
| <u>Fasting C-Peptide</u> (x 10 <sup>3</sup> )<br>Fasting Glucose | 11 ± 8               | 13 ± 8         | 0.31     |
| <u>Peak C-peptide</u> (x 10 <sup>3</sup> )<br>2-Hr Glucose       | 35 ± 11              | 49 ± 23        | <0.01    |
| <u>AUC C-Peptide</u> (x 10 <sup>3</sup> )<br>AUC Glucose         | 21 ± 8               | 30 ± 13        | <0.01    |

\*For comparisons between Parenteral and Oral trial groups

Figure 1. The prevalence of glucose abnormalities (IFG, IGT and/or an unconfirmed diabetic OGTT) with progression for the parenteral and oral groups separately and combined. There tended to be increasing percentages of individuals with abnormalities with decreasing time to diagnosis. The percentage of those with abnormalities 6 months before diagnosis was >80% for both the parenteral and oral groups.

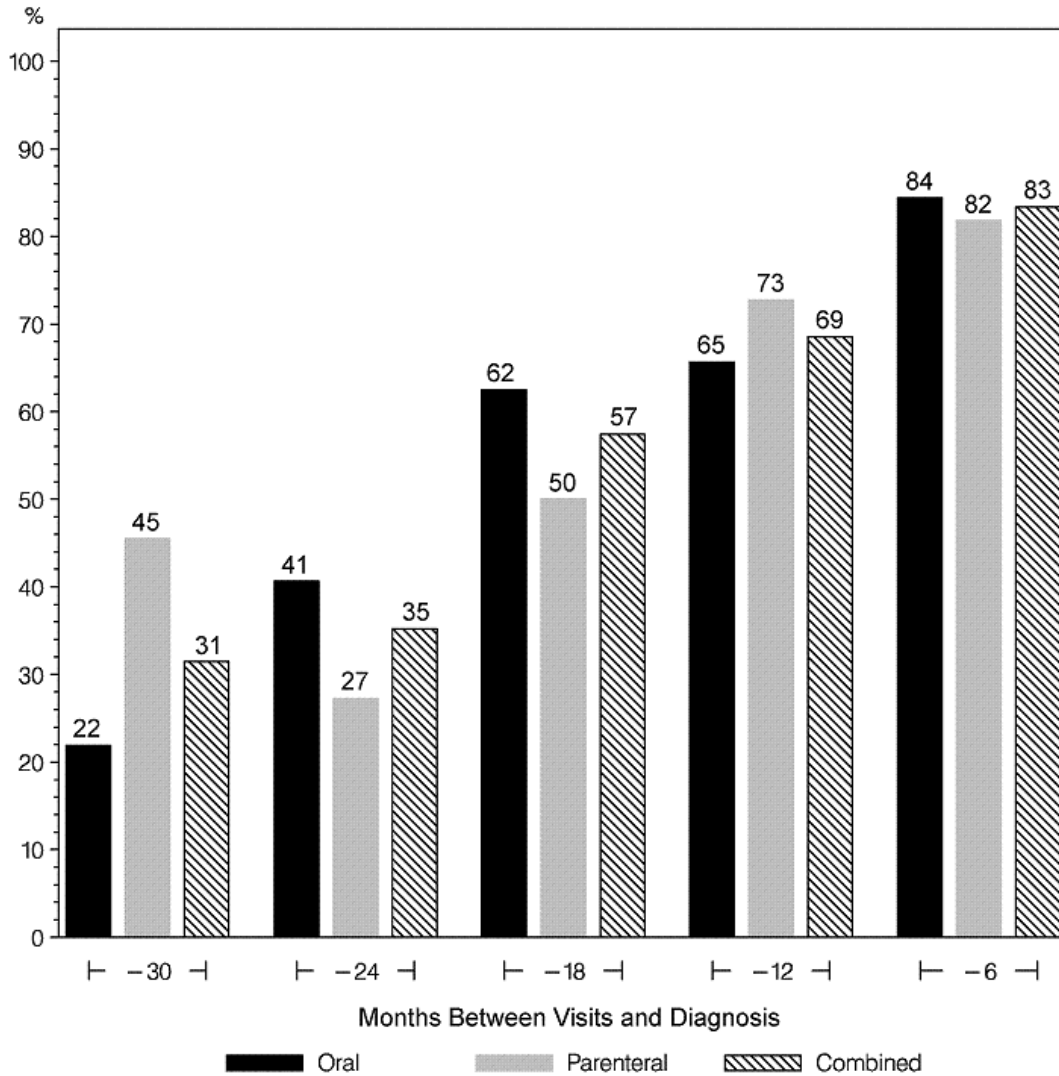

Supplement: 1006OnlineAppendix.pdf [file 1006OnlineAppendix.pdf]
